# Supplementary material
Source: publisher figshare collection journal article supplement (https://karger.figshare.com/ndownloader/files/18819224)
Supplement: Supplementary file 1 [file 18819224]

**Participating Countries and Investigators FIGARO-DKD**

**Argentina:** Diego Aizenberg, Inés Bartolacci, Diego Besada, Julio Bittar, Mariano Chahin, Alicia Elbert, Elizabeth Gelersztein, Alberto Liberman, Laura Maffei, Federico Pérez Manghi, Hugo Sanabria, Augusto Vallejos, Gloria Viñes, Alfredo Wassermann; **Australia**: Walter Abhayaratna, Peter Colman, David Colquhon, Elif Ekinci, Richard MacIsaac, Peak Mann Mah, Craig Nelson, David Packham, Alexia Pape, Simon Roger, Hugo Stephenson, Michael Suranyi, Duncan Topliss, James Vandeleur, Gary Wittert, Katie-Jane Wynne; **Austria:** Martin Clodi, Heinz Drexel, Christoph Ebenbichler, Evelyn Fliesser-Görzer, Ursula Hanusch, Bernhard Ludvik, Peter Neudorfer, Bernhard Paulweber, Rudolf Prager, Wolfgang Preiß, Friedrich Prischl, Gerit-Holger Schernthaner, Hans-Robert Schönherr, Harald Sourij; **Belgium**: Peter Doubel, Francis Duyck, Wendy Engelen, Pieter Gillard, Jean-Michel Hougardy, André Scheen, Marijn Speeckaert, Koen Stas, Luc van Gaal, Hilde Vanbelleghem; **Brazil:** Daniela Antunes, Roberto Botelho, Claudia Brito, Luis Canani, Maria Eugenia Canziani, Maria Cerqueira, Rogerio de Paula, Freddy Eliaschewitz, Carlos Eduardo Figueiredo, Adriana Forti, Miguel Hissa, Maurilo Leite Jr, Irene Noronha, Bruno Paolino, Nathalia Paschoalin, Raphael Paschoalin, Roberto Pecoits Filho, Marcio Pereira, Evandro Portes, Dalton Precoma, Rosangela Rea, Miguel Riella, Joao Eduardo Salles, Eduardo Vasconcellos, Sergio Vencio; **Bulgaria:** Radostina Boshnyashka, Ghassan Farah, Dimitar Georgiev, Valentina Gushterova, Neli Klyuchkova, Mariya Lucheva, Petya Manova, Dotska Minkova, Boyan Nonchev, Mariyana Pichmanova, Zhulieta Prakova, Rangel Rangelov, Rosen Rashkov, Pavel Stanchev, Bilyana Stoyanovska-Elencheva, Zhivko Tagarev, Theodora Temelkova-Kurktschieva, Svetla Vasileva, Mariana Yoncheva-Mihaylova; **Canada:** Paul Barre, Brian Carlson, James Conway, Serge Cournoyer, Richard Dumas, Sameh Fikry, Richard Goluch, Pavel Hamet, Randolph Hart, Sam Henein, Allan Kelly, Joanne Liutkus, Francois Madore, Valdemar Martinho, Giuseppe Mazza, Philip McFarlane, Dennis O’ Keefe, Sean Peterson, Daniel Schwartz, Daniel Shu, Andrew Steele, Ivor Teitelbaum, Guy Tellier, Karthik Tennankore, Sheldon Tobe, George Tsoukas, Richard Tytus, Louise Vitou, Michael Walsh, Stanley Weisnagel, Igor Wilderman, Jean-Francois Yale; **Chile:** Jorge Cobos, Juan Godoy, Fernando González, Marcelo Medina, Juan Carlos Palma, Juan Carlos Prieto, Eliana Reyes, Carmen Romero, Victor Saavedra, Paola Varleta; **China:** Ruifang Bu, Hanqing Cai, Nan Chen, Qinkai Chen, Dejun Chen, Jinluo Cheng, Youping Dong, Junwu Dong, Yuming Du, Yi Fang, Tianjun Guan, Weiying Guo, Chuanming Hao, Fangfang Jiang, Sheng Jian, Jian Kuang, Minxiang Lei, Ling Li, Dongmei Li, Hongmei Li, Jingmei Li, Yan Li, Yuxiu Li, Zhonghe Li, Fang Liu, Juan Liu, Yinghong Liu, Yuantao Liu, Zhihong Liu, Gang Long, Guoyuan Lu, Weiping Lu, Yibing Lu, Jianhua Ma, Zhaohui Mo, Jianying Niu, Ai Peng, Jiansong Shen, Feixia Shen, Bingyin Shi, Qing Su, Zhuxing Sun, Shuifu Tang, Nanwei Tong, Hao Wang, Xinjun Wang, Lihua Wang, Jianqin Wang, Li Wang, Jiali Wei, Chaoqing Wu, Tianfeng Wu, Changying Xing, Fei Xiong, Xudong Xu, Ning Xu, Jinkui Yang, Aiping Yin, Longyi Zeng, Hao Zhang, Yanlin Zhang, Ying Zhang, Zhiquan Zhao, Hongguang Zheng, Ling Zhong, Liyong Zhong, Dalong Zhu; **Colombia:** Clara Arango, Edgar Arcos, Gustavo Arcos, Sandra Barrera, Germán Barreto, Nelly Beltrán López, Diego Benitez, Guillermo Blanco, Rodrigo Botero, Tatiana Cárdenas, Julian Coronel, Carlos Cure, Carlos Durán, Luis García, Gustavo Guzmán, Eric Hernández, Jaime Ibarra, Carlos Jaramillo, Nicolás Jaramillo, William Kattah, Dora Molina, Gregorio Sánchez, Mónica Terront, Freddy Trujillo, Miguel Urina, Iván Villegas, Hernán Yupanqui; **Czech Republic:** Dino Alferi, Michal Brada, Jiri Brezina, Petr Bucek, Tomas Edelsberger, Drahomira Gulakova, Jitka Hasalova Zapletalova, Olga Hola, Lucie Hornova, Jana Houdova, Helena Hrmova, David Karasek, Sarka Kopecka, Richard Kovar, Eva Krcova, Jiri Kuchar, Vlasta Kutejova, Hana Lubanda, Ivo Matyasek, Magdalena Mokrejsova, Libor Okenka, Martin Prazny, Jiri Pumprla, Pavel Tomanek; **Denmark:** Jesper Bech, Jens Faber, Gunnar Gislason, Jørgen Hangaard, Grzegorz Jaroslaw Pacyk, Claus Juhl, Thure Krarup, Morten Lindhardt, Sten Madsbad, Joan Nielsen, Ulrik Pedersen-Bjergaard, Per Poulsen, Ole Rasmussen, Peter Rossing, Karoline Schousboe; **Finland:** Mikko Honkasalo, Mikko Honkasalo, Kari Humaloja, Kristiina Kananen, Ilkka Kantola, Arvo Koistinen, Pirkko Korsoff, Jorma Lahtela, Sakari Nieminen, Tuomo Nieminen, Karita Sadeharju, Jorma Strand, Sakari Sulosaari; **France:** Bertrand Cariou, François Chantrel, Sylvaine Clavel, Jean-Pierre Fauvel, Karim Gallouj, Didier Gouet, Bruno Guerci, Dominique Guerrot, Alexandre Klein, Yannick Le Meur, Rafik Mesbah, Arnaud Monier, Olivier Moranne, Ronan Roussel, Pierre Serusclat, Bruno Verges, Philippe Zaoui; **Germany:** Christoph Axthelm, Andreas Birkenfeld, Hermann Braun, Klaus Busch, Christel Contzen, Stefan Degenhardt, Karl Derwahl, Thomas Giebel, Andreas Hagenow, Hermann Haller, Christoph Hasslacher, Thomas Horacek, Wolfgang Jungmair, Christof Kloos, Thorsten Koch, Thilo Krüger, Joachim Müller, Ruth Nischik, Andreas Pfützner, Frank Pistrosch, Ludger Rose, Lars Rump, Volker Schettler, Ingolf Schiefke, Heike Schlichthaar, Bernd Schröppel, Thomas Schürholz, Helena Sigal, Lutz Stemler, Georg Strack, Heidrun Täschner, Nicole Toursarkissian, Diethelm Tschöpe, Achim Ulmer, Markus van der Giet, Christoph Wanner, Bernhard R. Winkelmann; **Greece:** Ioannis Boletis, Erifili Hatziagelaki, Ioannis Ioannidis, Theodora Kounadi, Ioanna Makriniotou, Dorothea Papadopoulou, Aikaterini Papagianni, Ploumis Passadakis, Ioannis Stefanidis; **Hong Kong:** Tai Pang Ip, Paul Lee, Ching Wan Ronald Ma, Vincent Yeung; **Hungary:** Dora Bajcsi, Peter Danos, Eleonora Harcsa, Akos Kalina, Szilvia Kazup, Katalin Keltai, Robert Kirschner, Julianna Kiss, Laszlo Kovacs, Beata Lamboy, Botond Literati-Nagy, Margit Mileder, Laszlo Nagy, Ebrahim Noori, Gabor Nyirati, Gizella Petro, Karoly Schneider, Albert Szocs, Szilard Vasas, Krisztina Wudi, Zsolt Zilahi, Marianna Zsom; **Ireland:** Joe Eustace, Mensud Hatunic, John Holian, Donal Reddan, Yvonne O’ Meara; **Israel:** Rosane Abramof Ness, Faiad Adawi, Zaher Armaly, Shaul Atar, Amir Bashkin, Sydney Ben Chetrit, Noa Berar Yanay, Gil Chernin, Mahmud Darawsha, Shai Efrati, Mazen Elias, Evgeny Farber, Mariela Glandt, Ehud Grossman, Majdi Halabi, Idit Liberty, Ofri Mosenzon, Assy Nimer, Doron Schwartz, Julio Wainstein, Yoram Yagil, Robert Zukermann; **Italy:** Giovanni Giorgio Battaglia, Enzo Bonora, Carlo Antonio Bossi, Paolo Calabrò, Franco Luigi Cavalot, Roberto Cimino, Michele Emdin, Enrico Fiaccadori, Paolo Fiorina, Carlo Bruno Giorda, Maria Cristina Gregorini, Gaetano La Manna, Davide Carlo Maggi, Antonello Pani, Norberto Perico, PierMarco Piatti, Antonio Pisani, Paola Ponzani, Gennaro Santorelli, Domenico Santoro, Giancarlo Tonolo, Roberto Trevisan, Anna Maria Veronelli; **Japan:** Hideo Araki, Osamu Ebisui, Naruhiro Fujita, Ryuichi Furuya, Yoshiyuki Hamamoto, Masahiro Hatazaki, Terumasa Hayashi, Takayuki Higashi, Yoshihide Hirohata, Shuji Horinouchi, Hirofumi Imoto, Akemi Inagaki, Masayuki Inagaki, Masao Ishii, Tamayo Ishiko, Hideaki Jinnouchi, Hidetoshi Kanai, Daisuke Kanda, Hideo Kanehara, Masayuki Kashima, Kiyoe Kato, Takeshi Katsuki, Katsunori Kawamitsu, Satsuki Kawasaki, Fumi Kikuchi, Hidetoshi Kikuchi, Kunihisa Kobayashi, Junko Koide, Miyuki Kubota, Yoshiro Kusano, Hajime Maeda, Sunao Matsubayashi, Kazunari Matsumoto, Yasuto Matsuo, Naoki Matsuoka, Hiroaki Miyaoka, Satoshi Murao, Mikihiro Nakayama, Jun Nakazawa, Takashi Nomiyama, Masayuki Noritake, Takayuki Ogiwara, Hiroshi Ohashi, Hideki Okamoto, Takeshi Osonoi, Nobuhiro Sasaki, Taiji Sekigami, Taro Shibasaki, Hirotaka Shibata, Junji Shinoda, Hiroshi Sobajima, Kazuya Sugitatsu, Toshiyuki Sugiura, Toru Sugiyama, Daisuke Suzuki, Masaaki Suzuki, Masaaki Suzuki, Asami Tanaka, Seiichi Tanaka, Izumi Tsunematsu, Makoto Ujihara, Daishiro Yamada, Masayo Yamada, Kazuo Yamagata, Fumiko Yamakawa, Ken Yamakawa, Yoshimitsu Yamasaki, Yuko Yambe, Hidekatsu Yanai, Tetsuyuki Yasuda; **Lithuania:** Dovile Kriauciuniene, Jurate Lasiene, Antanas Navickas, Lina Radzeviciene, Egle Urbanaviciene, Gediminas Urbonas, Audrone Velaviciene; **Malaysia:** Nor Azizah Aziz, Li Yuan Lee, Chek Loong Loh, Masni Mohamad, Norhaliza Mohd Ali, Rizmy Najme Khir, Nik Nur Fatnoon Nik Ahmad, Jeyakantha Ratnasingam, Wan Hasnul Halimi Bin Wan Hasan, Wan Mohd Izani Wan Mohamed; **Mexico:** Melchor Alpizar Salazar, Sandro Avila Pardo, Miriam Bastidas Adrian, Alfredo Chew Wong, Jorge Escobedo de la Peña, Guillermo Fanghänel Salmón, Pedro García Hernández, Guillermo González Gálvez, José González González, Ramiro Gutiérrez Ochoa, Saúl Irizar Santana, José Lazcano Soto, Magdalena Madero Rovalo, Gustavo Méndez Machado, Luis Nevarez Ruiz, Gabriel Ramos López, Arturo Saldaňa Mendoza, Leobardo Sauque Reyna, Gustavo Solache Ortiz, Rafael Valdez Ortiz, Juan Villagordoa Mesa; **Netherlands:** R.C. Bakker, J.N.M. Barendregt, A.H. Boonstra, C.B. Brouwer, M. van Buren, Ron Gansevoort, Adriaan Kooy, Marielle Krekels, Ruud J.M. van Leendert, Louis A.G. Lieverse, P.T. Luik, E. Lars Penne, Bert-Jan van den Born, Liffert Vogt; **New Zealand:** John Baker, Veronica Crawford, Rick Cutfield, Peter Dunn, Jeremy Krebs, Kingsley Nirmalaraj, Russell Scott, Nine Smuts; **Norway:** Emil Asprusten,Erik Eriksen, Trine Finnes, Robert Hagemeier, Hans Høivik, Thomas Karlsson, Knut Risberg, Jan Rocke, Hilde Selsas, Leidulv Solnør, Frode Thorup; **Philippines:** Albert Bautista, Elizabeth Catindig, Roberto Mirasol, Glenda Pamugas, Maribel Tanque, Louie Tirador; **Poland:** Patrycja Butrymowicz, Kazimierz Ciechanowski, Grazyna Cieslik, Edward Franek, Janusz Gumprecht, Michal Hoffmann, Jolanta Krzykowska, Ilona Kurnatowska, Katarzyna Landa, Adam Madrzejewski, Katarzyna Madziarska, Stanislaw Mazur, Piotr Napora, Michal Nowicki, Anna Ocicka-Kozakiewicz, Barbara Rewerska, Teresa Rusicka, Jan Ruxer, Ewa Skokowska, Andrzej Stankiewicz, Tomasz Stompor, Agnieszka Tiuryn-Petrulewicz, Katarzyna Wasilewska, Bogna Wierusz-Wysocka, Renata Wnetrzak-Michalska; **Portugal:** Edgar Almeida, Rosa Ballesteros, Carlos Barreto, Ilidio Brandao, Rui Carvalho, Cesar Esteves, Jose Guia, Susana Heitor, Pedro Matos, Pedro Melo, Fernando Nolasco, Amalia Pereira, Cristina Roque, Francisco Rosario, Gil Silva, Ana Silva, Fernando Teixeira e Costa, Ana Vila Lobos; **Puerto Rico:** Gregorio Cortes-Maisonet, Amaury Roman-Miranda; **Romania:** Adrian Albota, Cornelia Bala, Hortensia Barbonta, Elena Caceaune, Doina Catrinoui, Ciprian Constantin, Adriana Dumitrescu, Nicoleta Mindrescu, Cristina Mistode, Gabriela Negrisanu, Adriana Onaca, Silvia Paveliu, Ella Pintilei, Lavinia Pop, Amorin Popa, Alexandrina Popescu, Gabriela Radulian, Iosif Szilagyi, Liana Turcu, Georgeta Vacaru, Adrian Vlad; **Russia:** Mikhail Antsiferov, Mikhail Arkhipov, Andrey Babkin, Vitaliy Baranov, Olga Barbarash, Elena Chernyavskaya, Arkadiy Demko, Alexander Dreval, Anton Edin, Polina Ermakova, Albert Galyavich, Leyla Gaysina, Ivan Gordeev, Irina Ipatko, Marina Kalashnikova, Yuriy Khalimov, Vadim Klimontov, Zhanna Kobalava, Elena Kosmacheva, Natalya Koziolova, Lyudmila Kvitkova, Sergey Levashov, Roman Libis, Natalia Malykh, Sofya Malyutina, Vyacheslav Marasaev, Vyacheslav Mareev, Vladimir Martynenko, Imad Merai, Ashot Mkrtumyan, Galina Nechaeva, Konstantin Nikolaev, Shamil Palyutin, Nina Petunina, Leonid Pimenov, Elena Rechkova, Tatyana Rodionova, Oksana Rymar, Ruslan Sardinov, Olga Semenova, Alexander Sherenkov, Elena Smolyarchuk, Oleg Solovev, Leonid Strongin, Olga Ukhanova, Nadezhda Verlan, Natalya Vorokhobina, Davyd Yakhontov, Elena Zakharova, Alsu Zalevskaya, Olga Zanozina, Elena Zhdanova, Larisa Zhukova, Tatyana Zykova; **Singapore:** Yong Mong Bee, Chee Fang Sum, Ru San Tan; **Slovakia:** Jana Babikova, Ingrid Buganova, Andrej Dzupina, Zuzana Ochodnicka, Dalibor Sosovec, Denisa Spodniakova; **South Africa:** Fayzal Ahmed, Aslam Amod, Sindeep Bhana, Larry Distiller, Dirkie Jansen van Rensburg, Mukesh Joshi, Shaifali Joshi, Deepak Lakha, Essack Mitha, Gracjan Podgorski, Naresh Ranjith, Brian Rayner, Paul Rheeder, Mohamed Sarvan, Mary Seeber, Heidi Siebert, Mohammed Tayob, Julien Trokis, Dorothea Urbach, Louis van Zyl; **South Korea:** Young Min Cho, ChoonHee Chung, YouCheol Hwang, JunGoo Kang, HyeSoon Kim, SinGon Kim, InJoo Kim, JaeHyeon Kim, WooJe Lee, ByungWan Lee, Soo Lim, Cheol Young Park, Jae Myung Yu; **Spain:** Hanane Bouarich, Francesca Calero, Cristina Castro, Fernando Cereto Castro, Secundino Cigarrán Guldris, Josep Cruzado Garrit, Fernando de Álvaro, Josep Galcerán, Olga González Albarrán, Julio Hernández Jaras, Meritxell Ibernón, Francisco Martínez Deben, Mª Dolores Martínez Esteban, Judith Martins, Juan Mediavilla, Alfredo Michán, José María Pascual Izuel, Julio Pascual Santos, Esteban Poch, Manuel Polaina Rusillo, Josep Redón, Carlos Sánchez Juan, Rafael Santamaría Olmo, José Julián Segura de la Morena, Daniel Seron, Alfonso Soto, Maribel Troya; **Sweden:** Annette Bruchfeld, Dan Curiac, Ken Eliasson, Malin Frank, Gregor Guron, Olof Hellberg, Margareta Hellgren, Hans Larnefeldt, Carl-Johan Lindholm, Magnus Löndahl, Erik Rein-Hedin, Inga Soveri, Jonas Spaak, Bengt-Olov Tengmark; **Switzerland:** Stefan Bilz, Marc Donath, Markus Laimer, Antoinette Pechère-Bertschi, Gottfried Rudofsky, Christopher Strey, Gregoire Wuerzner; **Taiwan:** Chiz-Tzung Chang, Cheng-Chieh Hung, Ju-Ying Jiang, Chien-Te Lee, Der-Cherng Tarng, Shih-Te Tu, Mai-Szu Wu, Ming-Ju Wu; **Thailand:** Chaicharn Deerochanawong, Natapong Kosachunhanan, Chatlert Pongchaiyakul, Bancha Satirapoj, Piyamitr Sritara; **Turkey:** Ozer Badak, Murat Cayli, Necmi Eren, Ibrahim Gul, Ismail Kocyigit, Abdulbaki Kumbasar, Ayetin Oguz, Oner Ozdogan, Idris Sahin, Ramazan Sari, Talat Tavli, Ahmet Temizhan, Mustafa Tigen, Sedat Ustundag, Yavuz Yenicerioglu; **Ukraine:** Iryna Bondarets, Volodymyr Botsyurko, Viktoriia Chernikova, Oleksandra Donets, Ivan Fushtey, Mariia Grachova, Anna Isayeva, Dmytro Kogut, Julia Komisarenko, Nonna Kravchun, Kateryna Malyar, Borys Mankovsky, Liliya Martynyuk, Vitaliy Maslyanko, Halyna Myshanych, Larysa Pererva, Nataliia Pertseva, Oleksandr Serhiyenko, Ivan Smirnov, Liubov Sokolova, Vasyl Stryzhak, Maryna Vlasenko; **United Kingdom:** Imrozia Arif, Cuong Dang, Fahmy Hanna, Hassan Kahal, Dhanya Kalathil, Anne Kilvert, Sui Phi Kon, Christina Kyriakidou, Kieran McCafferty, Sam Rice, Pauline Swift, Arutchelvam Vijayaraman, Yuk-ki Wong; **United States:** Idalia Acosta, Atoya Adams, Sharon Adler, Dilawar Ajani, Radica Alicic, Amer Al-Karadsheh, Sreedhara Alla, D. Allison, Nabil Andrawis, Ahmed Arif, Ahmed Awad, Masoud Azizad, Michael Bahrami, Shweta Bansal, Steven Barag, Ahmad Barakzoy, Mark Barney, Khalid Bashir, Jose Bautista, Srinivasan Beddhu, Sabrina Benjamin, Ramin Berenji, John Bertsch, Anuj Bhargava, Jose Birriel, David Bleich, Jonathan Bornfreund, Harjeet Brar, Susan Brian, Stephen Brietzke, Osvaldo Brusco, Anna Burgner, Robert Busch, Rafael Canadas, Maria Caramori, Jose Cardona, Jose Carpio, Christopher Case, Humberto Cruz, Ramprasad Dandillaya, Soni Dhanireddy, Zia Din, Bradley Dixon, Ankur Doshi, Mahfouz El Shahawy, Mohammed El-Shahawy, John Evans, George Fadda, Umar Farooq, Roland Fernando, Raymond Fink, Brian First, David Fitz-Patrick, John Flack, Patrick Fluck, Leon Fogelfeld, Vivian Fonseca, Juan Frias, Claude Galphin, Luis Garcia-Mayol, Gary Goldstein, Edgar Gonzalez, Francisco Gonzalez-Abreu, Ashwini Gore, David Grant, Violet Habwe, Stephen Halpern, Maxine Hamilton, Jamal Hammoud, Stuart Handelsman, Israel Hartman, Glenn Heigerick, German Hernandez, Carlos Hernandez-Cassis, Carlos Herrera, Ali Iranmanesh, Timothy Jackson, Mahendra Jain, Kenneth Jamerson, Karen Johnson, Zeid Kayali, William Kaye, Bobby Khan, Muhammad Khan, Sourabh Kharait, M. Sue Kirkman, Stanley Koch, Nelson Kopyt, Gary Korff, Wayne Kotzker, Csaba Kovesdy, Camil Kreit, Arvind Krishna, Saeed Kronfli, Keung Lee, Derek LeJeune, Brenda Lemus, Sam Lerman, Douglas Linfert, Henry Lora, Alexander Lurie, Geetha Maddukuri, Alexander Magno, Louis Maletz, Sreedhar Mandayam, Mustafa Mandviwala, Mariana Markell, Earl Martin, Ronald Mayfield, Caroline Mbogua, Dierdre McMullen, Carl Meisner, Jill Meyer, Stephen Minton, Bharat Mocherla, Manuel Montero, Moustafa Moustafa, Salil Nadkarni, Samer Nakhle, Jesus Navarro, Nilda Neyra, Romanita Nica, Philip Nicol, Paul Norwood, Visal Numrungroad, Richard O’ Donovan, A. Odugbesan, David Oliver, Suzanne Oparil, Jorge Paoli-Bruno, Samir Parikh, Rajesh Patel, Rakesh Patel, Aldo Peixoto, Pablo Pergola, Karlton Pettis, Roberto Pisoni, Mirela Ponduchi, Larry Popeil, Jorge Posada, Sharma Prabhakar, Rupesh Raina, Kodangudi Ramanathan, Luis Ramon-Gonez, Anjay Rastogi, Efrain Reisin, Marc Rendell, Michael Rocco, Hugo Romeu, Sylvia Rosas, Dennis Ross, Jeffrey Rothman, Lance Rudolph, Yusuf Ruhullah, Gary Ruoff, Jeffrey Ryu, Mandeep Sahani, Garfield Samuels, William Sanchez, Sanjeev Saxena, David Scott, Gilberto Seco, Harvey Serota, Tariq Shafi, Nauman Shahid, Michael Shanik, Santosh Sharma, Arjun Sinha, James Smelser, Mark Smith, Kyaw Soe, Richard Solomon, Eugene Soroka, Joseph Soufer, Rosa Suarez, Bala Subramanian, Harold Szerlip, Aparna Tamirisa, Stephen Thomson, Tuan-Huy Tran, Richard Treger, Gretel Trullenque, Thomas Turk, Guillermo Umpierrez, Daniel Urbach, Martin Valdes, Shujauddin Valika, Damaris Vega, Peter Weissman, Adam Whaley-Connell, Jonathan Winston, Jonathan Wise, Michael Yuryev, Steven Zeig; **Vietnam:** Lam Van Hoang, Tran Khanh, Boi Ngoc Nguyen, Nguyen Minh Nui, Pham Nguyen Son, Lan Phuong Tran.
